# Supplementary material
Source: MDPI journal article supplement (https://www.mdpi.com/2311-7524/8/4/334)
Supplement: s1 [file s1]

**Table S1.** Initial physico-chemical characteristics of the studied soils at a depth of 0–25 cm in two growing seasons.

| Two growing seasons.          |                                 |                  |                  |
|-------------------------------|---------------------------------|------------------|------------------|
| Properties                    |                                 | 2018/2019 season | 2019/2020 season |
| Particle size distribution    |                                 |                  |                  |
| Sand                          |                                 | 9.6±0.5          | 9.5±0.6          |
| Silt                          | %                               | 20.1± 0.9        | 20.1±1.2         |
| Clay                          |                                 | 70.3±2.4         | 70.4±3.0         |
| Texture class                 |                                 | Clay             |                  |
| Physico-chemical properties   |                                 |                  |                  |
| HC                            | cm <sup>3</sup> h <sup>-1</sup> | 0.03±0.00        | 0.03±0.00        |
| FC                            |                                 | 34.3±2.12        | 34.6±2.24        |
| WP                            | %                               | 19.7±1.40        | 19.8±1.52        |
| AW                            |                                 | 14.6±0.82        | 14.7±0.77        |
| ECe                           | dS m <sup>-1</sup>              | 1.91±0.12        | 1.94±0.11        |
| pH (1:2.5 soil/water extract) |                                 | 7.52±0.31        | 7.54±0.40        |
| OM                            |                                 | 1.11±0.01        | 1.12±0.01        |
| CaCO <sub>3</sub>             | %                               | 3.87±0.11        | 3.75±0.15        |
|                               |                                 |                  |                  |
| N                             |                                 | 17.6±1.28        | 18.7±1.33        |
| P                             |                                 | 6.11±0.29        | 6.32±0.31        |
| K                             |                                 | 51.5±3.83        | 52.4±4.02        |
| Fe                            | mg kg <sup>-1</sup>             | 4.73±0.15        | 4.95±0.21        |
| Zn                            |                                 | 0.89±0.05        | 0.97±0.06        |
| Mg                            |                                 | 0.37±0.01        | 0.39±0.01        |
| Mn                            |                                 | 2.87±0.16        | 2.89±0.20        |

The data are means±SE ECe= Electrical conductivity, OM= Organic matter content, HC= Hydraulic conductivity, FC= Field capacity, WP= Wilting point, and AW= Available water.

**Table S2.** Monthly average of meteorological data of the experimental farm during 2018/ 2019 and 2019/2020 seasons.

| Month    | 2018/2019 season     |         |         |         | 2019/2020 season     |         |         |         |
|----------|----------------------|---------|---------|---------|----------------------|---------|---------|---------|
|          | Air temperature (°C) |         |         | ARH (%) | Air temperature (°C) |         |         | ARH (%) |
|          | Maximum              | Minimum | Average |         | Maximum              | Minimum | Average |         |
| October  | 30.0                 | 16.4    | 23.2    | 45.9    | 32.4                 | 15.6    | 24.0    | 45.0    |
| November | 26.0                 | 10.7    | 18.4    | 52.8    | 27.2                 | 11.5    | 19.4    | 51.3    |
| December | 20.0                 | 8.71    | 14.4    | 56.4    | 23.5                 | 7.89    | 15.7    | 60.3    |
| January  | 19.0                 | 6.25    | 12.6    | 55.5    | 21.0                 | 6.14    | 13.6    | 55.2    |
| February | 21.8                 | 11.1    | 16.5    | 43.8    | 23.4                 | 6.97    | 15.2    | 53.3    |
| March    | 23.6                 | 14.0    | 18.8    | 37.2    | 26.5                 | 8.00    | 17.2    | 45.6    |
| April    | 29.0                 | 16.4    | 22.7    | 37.7    | 32.5                 | 12.1    | 22.3    | 38.8    |
| May      | 37.5                 | 21.5    | 29.5    | 29.6    | 36.3                 | 15.3    | 25.8    | 30.2    |

ARH= Relative humidity average.

**Table S3.** A preliminary study to identify the optimal sowing date, seed soaking period, foliar spray times, and ascorbic acid (AsA) concentrations for parsley.

| Treatments                                                      | 2016/2017               |                                     |                                      | 2017/2018               |                                     |                                      |
|-----------------------------------------------------------------|-------------------------|-------------------------------------|--------------------------------------|-------------------------|-------------------------------------|--------------------------------------|
|                                                                 | Emergence (%)           | Dry weight (g plant <sup>-1</sup> ) | Seed weight (g plant <sup>-1</sup> ) | Emergence (%)           | Dry weight (g plant <sup>-1</sup> ) | Seed weight (g plant <sup>-1</sup> ) |
| Sowing dates:                                                   |                         |                                     |                                      |                         |                                     |                                      |
| September                                                       | 81.7 <sup>b</sup> ±7.4  | 16.1 <sup>b</sup> ±1.3              | 8.0 <sup>b</sup> ±0.6                | 81.2 <sup>b</sup> ±8.0  | 15.1 <sup>b</sup> ±1.1              | 8.9 <sup>b</sup> ±0.7                |
| October                                                         | 89.6 <sup>a</sup> ±8.2  | 18.2 <sup>a</sup> ±1.5              | 9.8 <sup>a</sup> ±0.7                | 91.2 <sup>a</sup> ±8.9  | 19.1 <sup>a</sup> ±1.5              | 10.4 <sup>a</sup> ±0.9               |
| November                                                        | 81.3 <sup>b</sup> ±7.6  | 14.3 <sup>c</sup> ±1.2              | 7.6 <sup>b</sup> ±0.6                | 80.9 <sup>b</sup> ±7.7  | 14.8 <sup>b</sup> ±1.1              | 8.1 <sup>c</sup> ±0.6                |
| December                                                        | 64.2 <sup>c</sup> ±5.6  | 8.7 <sup>d</sup> ±0.7               | 5.8 <sup>c</sup> ±0.4                | 65.0 <sup>c</sup> ±6.1  | 9.2 <sup>c</sup> ±0.8               | 6.2 <sup>d</sup> ±0.5                |
| LSD <sub>(0.05)</sub>                                           | 5.4                     | 1.2                                 | 0.5                                  | 6.1                     | 1.1                                 | 0.6                                  |
| Seed soaking periods:                                           |                         |                                     |                                      |                         |                                     |                                      |
| 0 h (Control)                                                   | 71.0 <sup>c</sup> ±6.0  | 13.4 <sup>c</sup> ±1.1              | 7.0 <sup>c</sup> ±0.6                | 72.2 <sup>b</sup> ±5.8  | 13.6 <sup>c</sup> ±1.2              | 7.1 <sup>c</sup> ±0.5                |
| 4 h                                                             | 78.5 <sup>b</sup> ±7.4  | 14.4 <sup>b</sup> ±1.3              | 8.7 <sup>b</sup> ±0.7                | 77.2 <sup>b</sup> ±6.3  | 15.2 <sup>b</sup> ±1.5              | 8.9 <sup>b</sup> ±0.6                |
| 8 h                                                             | 84.1 <sup>a</sup> ±7.9  | 17.2 <sup>a</sup> ±1.7              | 9.8 <sup>a</sup> ±0.8                | 84.1 <sup>a</sup> ±7.0  | 16.9 <sup>a</sup> ±1.7              | 9.9 <sup>a</sup> ±0.7                |
| 12 h                                                            | 65.2 <sup>d</sup> ±5.2  | 11.8 <sup>d</sup> ±0.8              | 6.4 <sup>d</sup> ±0.5                | 59.6 <sup>c</sup> ±4.0  | 11.1 <sup>d</sup> ±1.0              | 6.5 <sup>d</sup> ±0.4                |
| LSD <sub>(0.05)</sub>                                           | 5.2                     | 1.1                                 | 0.5                                  | 5.4                     | 1.0                                 | 0.5                                  |
| Times of foliar spray of AsA at 2 mM:                           |                         |                                     |                                      |                         |                                     |                                      |
| 0 (Control)                                                     | 72.4 <sup>c</sup> ±6.0  | 13.0 <sup>d</sup> ±1.1              | 7.1 <sup>d</sup> ±0.4                | 73.1 <sup>c</sup> ±6.1  | 13.2 <sup>d</sup> ±0.9              | 7.4 <sup>d</sup> ±0.5                |
| 1 spray                                                         | 73.9 <sup>bc</sup> ±6.2 | 14.1 <sup>c</sup> ±1.2              | 7.7 <sup>c</sup> ±0.6                | 74.3 <sup>bc</sup> ±6.3 | 14.7 <sup>c</sup> ±1.1              | 8.1 <sup>c</sup> ±0.5                |
| 2 sprays                                                        | 77.7 <sup>b</sup> ±7.1  | 15.4 <sup>b</sup> ±1.4              | 8.5 <sup>b</sup> ±0.6                | 79.2 <sup>ab</sup> ±6.9 | 16.4 <sup>b</sup> ±1.4              | 9.2 <sup>b</sup> ±0.6                |
| 3 sprays                                                        | 83.0 <sup>a</sup> ±7.4  | 17.4 <sup>a</sup> ±1.6              | 9.6 <sup>a</sup> ±0.7                | 83.2 <sup>a</sup> ±7.4  | 17.8 <sup>a</sup> ±1.8              | 10.4 <sup>a</sup> ±0.8               |
| 4 sprays                                                        | 77.5 <sup>b</sup> ±7.2  | 15.8 <sup>b</sup> ±1.3              | 8.4 <sup>b</sup> ±0.6                | 79.2 <sup>ab</sup> ±6.8 | 16.1 <sup>b</sup> ±1.3              | 9.5 <sup>d</sup> ±0.7                |
| LSD <sub>(0.05)</sub>                                           | 5.0                     | 1.1                                 | 0.5                                  | 6.0                     | 1.2                                 | 0.6                                  |
| AsA levels (seed soaking for 4 h and foliar spray for 3 times): |                         |                                     |                                      |                         |                                     |                                      |
| 0 mM                                                            | 79.2 <sup>c</sup> ±6.7  | 14.3 <sup>d</sup> ±1.0              | 7.8 <sup>d</sup> ±0.5                | 79.6 <sup>c</sup> ±6.5  | 14.6 <sup>d</sup> ±0.9              | 8.1 <sup>d</sup> ±0.6                |
| 0.5 mM                                                          | 81.2 <sup>bc</sup> ±6.9 | 15.9 <sup>c</sup> ±1.3              | 8.5 <sup>c</sup> ±0.7                | 80.9 <sup>bc</sup> ±6.8 | 16.0 <sup>c</sup> ±1.2              | 8.9 <sup>c</sup> ±0.6                |
| 1.0 mM                                                          | 84.2 <sup>b</sup> ±7.4  | 17.6 <sup>b</sup> ±1.5              | 9.6 <sup>b</sup> ±0.8                | 86.3 <sup>ab</sup> ±7.0 | 17.8 <sup>b</sup> ±1.2              | 10.1 <sup>b</sup> ±0.8               |
| 2.0 mM                                                          | 89.9 <sup>a</sup> ±7.9  | 18.9 <sup>a</sup> ±1.6              | 10.4 <sup>a</sup> ±0.8               | 90.4 <sup>a</sup> ±7.1  | 19.2 <sup>a</sup> ±1.4              | 11.2 <sup>a</sup> ±0.8               |
| 3.0 mM                                                          | 64.7 <sup>d</sup> ±5.2  | 12.8 <sup>e</sup> ±0.9              | 7.4 <sup>d</sup> ±0.5                | 71.0 <sup>d</sup> ±5.8  | 13.1 <sup>e</sup> ±0.9              | 7.5 <sup>d</sup> ±0.5                |
| LSD <sub>(0.05)</sub>                                           | 5.5                     | 1.3                                 | 0.6                                  | 6.5                     | 1.4                                 | 0.7                                  |

Values (means±SE) with similar letters are not significantly different at  $p \leq 0.05$ .

**Notes:** Emergence (%) was determined based on only seed soaking in AsA concentrations before sowing, however, the other traits (dry weight and seed weight plant<sup>-1</sup>) were determined based on seed soaking plus foliar spraying with AsA concentrations. The sowing dates were the first week of each month.

**Table S4.** Fractionation of essential volatile oil of the produced parsley seeds (identified by Gas Chromatography-Mass Spectroscopy)

|     |         | SD vs. Oct.           | Oct. (24.0 °C) |       |       | Nov. (19.4 °C) |       |       | Dec. (15.7 °C) |       |       | Jan. (13.6 °C) |       |       |
|-----|---------|-----------------------|----------------|-------|-------|----------------|-------|-------|----------------|-------|-------|----------------|-------|-------|
|     |         | AsA level             | 0 mM           | 1 mM  | 2 mM  | 0 mM           | 1 mM  | 2 mM  | 0 mM           | 1 mM  | 2 mM  | 0 mM           | 1 mM  | 2 mM  |
| No. | RT Min. | Oil fractions         | Area sum (%)   |       |       |                |       |       |                |       |       |                |       |       |
| 1   | 4.71    | $\alpha$ -Pinene      | 1.22           | 0.92  | 1.83  | 2.30           | 1.30  | 1.24  | 0.21           | 0.54  | 1.01  | 0.57           | 0.58  | 0.56  |
| 2   | 4.93    | Limonene              | 1.43           | 1.57  | 0.58  | 0.57           | 1.06  | 0.62  | 0.87           | 0.57  | 0.57  | 0.34           | 0.33  | 0.35  |
| 3   | 5.03    | Camphene              | 1.01           | 1.66  | 2.12  | 1.24           | 1.42  | 2.54  | 0.36           | 0.76  | 0.59  | 5.32           | 5.37  | 5.35  |
| 4   | 5.17    | $\beta$ -Pinene       | 0.61           | 0.57  | 2.47  | 0.94           | 1.60  | 1.67  | 0.87           | 1.14  | 1.16  | 0.35           | 0.31  | 0.32  |
| 5   | 5.52    | $\beta$ -Myrcene      | 1.13           | 2.81  | 0.63  | 1.31           | 1.34  | 1     | 2.96           | 1.18  | 0.65  | 2.82           | 2.82  | 2.82  |
| 6   | 5.70    | p-Cymenene            | 1.40           | 0.79  | 0.96  | 1.42           | 1.03  | 1.68  | 2.73           | 1.34  | 1.90  | 1.27           | 1.27  | 1.28  |
| 7   | 5.84    | D-Limonene            | 3.01           | 0.34  | 1.14  | 0.88           | 1.70  | 0.72  | 2.08           | 1.03  | 1.27  | 1.62           | 1.66  | 1.64  |
| 8   | 5.89    | $\gamma$ -Terpinene   | 6.60           | 2.11  | 4.75  | 1.54           | 0.82  | 1.1   | 1.83           | 0.97  | 1.2   | 1.48           | 1.41  | 1.43  |
| 9   | 6.01    | Farnesole             | 3.06           | 7.76  | 0.33  | 1.67           | 0.74  | 0.64  | 0.55           | 0.97  | 0.84  | 0.82           | 0.87  | 0.85  |
| 10  | 6.31    | $\alpha$ -Fenchene    | 6.15           | 0.65  | 0.37  | 0.56           | 0.75  | 1.49  | 0.80           | 1.58  | 1.30  | 0.73           | 0.73  | 0.71  |
| 11  | 6.35    | 3-Carene              | 3.37           | 0.81  | 0.44  | 1.96           | 0.78  | 0.53  | 1.92           | 1.36  | 0.73  | 1.51           | 1.51  | 1.52  |
| 12  | 6.50    | $\alpha$ -Asarone     | 2.00           | 0.36  | 0.63  | 0.43           | 0.76  | 1.07  | 4.13           | 1.09  | 0.80  | 0.72           | 0.71  | 0.72  |
| 13  | 7.51    | $\alpha$ -Terpinolene | 0.90           | 0.61  | 0.36  | 0.42           | 1.67  | 3.45  | 2.04           | 0.66  | 1.71  | 1.51           | 1.51  | 1.54  |
| 14  | 7.82    | Cis-Verbenone         | 6.10           | 0.99  | 1.21  | 0.53           | 1.11  | 0.69  | 1.62           | 2.13  | 1.60  | 1.01           | 1.01  | 1.04  |
| 15  | 8.27    | (-)-Verbenone         | 2.33           | 3.81  | 0.55  | 3.99           | 1.49  | 0.82  | 2.65           | 1.76  | 0.91  | 4.07           | 4.01  | 4.04  |
| 16  | 8.80    | D-Verbenone           | 1.54           | 0.56  | 0.93  | 0.84           | 1.08  | 0.54  | 0.77           | 2.75  | 1.57  | 1.44           | 1.46  | 1.41  |
| 17  | 9.07    | p-Thymol              | 2.96           | 0.54  | 0.37  | 0.56           | 0.82  | 0.79  | 1.79           | 0.43  | 1.76  | 1.11           | 1.16  | 1.14  |
| 18  | 9.46    | Terpenolene           | 1.14           | 0.37  | 0.60  | 0.53           | 1.13  | 0.71  | 1.49           | 3.85  | 1.14  | 0.41           | 0.41  | 0.40  |
| 19  | 9.87    | Eremophilene          | 0.57           | 0.51  | 0.40  | 0.78           | 0.92  | 0.58  | 0.89           | 1.57  | 0.76  | 0.61           | 0.65  | 0.60  |
| 20  | 10.36   | Caryophyllene         | 1.06           | 0.39  | 0.53  | 0.52           | 0.82  | 0.88  | 1.51           | 0.65  | 0.94  | 1.46           | 1.44  | 1.48  |
| 21  | 10.54   | Isocaryophyllene      | 0.98           | 0.63  | 0.59  | 0.73           | 1.26  | 0.91  | 0.35           | 0.90  | 1.52  | 0.46           | 0.52  | 0.44  |
| 22  | 11.30   | Myristicine           | 22.78          | 31.76 | 32.43 | 39.44          | 37.11 | 37.41 | 11.82          | 33.81 | 48.05 | 9.19           | 10.31 | 10.41 |
| 23  | 11.91   | o-PyCt A              | 1.74           | 0.57  | 1.2   | 1.58           | 1.21  | 0.85  | 2.61           | 3.77  | 1.03  | 2.41           | 1.44  | 1.45  |
| 24  | 12.60   | Apiol                 | 19.13          | 22.24 | 29.11 | 13.16          | 22.46 | 25.39 | 9.50           | 7.08  | 12.93 | 9.26           | 10.04 | 10.07 |
| 25  | 13.52   | Glycer-Lin            | 0.66           | 0.54  | 0.66  | 1.23           | 1.00  | 1.13  | 2.21           | 5.73  | 1.42  | 1.94           | 0.95  | 0.92  |
| 26  | 13.60   | Orientin              | 0.32           | 0.71  | 6.98  | 1.36           | 2.96  | 1.02  | 3.39           | 1.28  | 0.66  | 1.27           | 1.22  | 1.23  |
| 27  | 13.66   | Farnesole             | 0.56           | 0.51  | 1.99  | 3.65           | 0.58  | 0.74  | 5.66           | 0.67  | 0.75  | 4.36           | 4.38  | 4.37  |
| 28  | 14.02   | Ger-Iso               | 0.31           | 0.42  | 0.33  | 1.06           | 0.54  | 0.72  | 0.61           | 2.31  | 0.53  | 0.66           | 0.69  | 0.68  |
| 29  | 14.31   | GlyMonoOl             | 0.45           | 1.23  | 0.44  | 0.48           | 0.51  | 0.61  | 4.01           | 0.54  | 1.01  | 2.66           | 2.63  | 2.61  |
| 30  | 14.70   | Hexad.A               | 0.63           | 0.93  | 0.49  | 1.89           | 5.13  | 0.74  | 8.87           | 4.73  | 0.58  | 4.77           | 4.73  | 4.72  |
| 31  | 15.30   | Schaftoside           | 0.65           | 0.72  | 0.34  | 0.51           | 0.51  | 0.58  | 0.79           | 0.92  | 2.17  | 5.25           | 5.28  | 5.29  |
| 32  | 15.81   | 9-OctaDA(Z)           | 0.62           | 0.93  | 0.36  | 1.01           | 0.48  | 0.48  | 4.15           | 4.71  | 0.56  | 8.69           | 8.66  | 8.65  |
| 33  | 16.09   | Quercetin             | 0.42           | 1.16  | 0.38  | 0.52           | 0.50  | 0.45  | 0.53           | 0.42  | 0.58  | 1.11           | 1.13  | 1.14  |
| 34  | 16.31   | 2-Hyd-Trimeth         | 0.40           | 0.68  | 0.42  | 0.67           | 0.65  | 0.46  | 1.85           | 1.95  | 0.75  | 1.87           | 1.82  | 1.88  |
| 35  | 17.25   | 3-Hyd-trimeth         | 0.36           | 0.48  | 0.40  | 0.81           | 0.41  | 0.45  | 1.04           | 0.50  | 0.62  | 0.71           | 0.76  | 0.70  |
| 36  | 17.81   | E.dienoic, ME         | 0.39           | 0.94  | 0.37  | 0.77           | 0.39  | 0.65  | 1.48           | 0.71  | 0.62  | 0.95           | 0.92  | 0.94  |
| 37  | 18.34   | Epimedin B            | 0.33           | 1.04  | 0.45  | 1.19           | 1.05  | 0.52  | 1.14           | 0.85  | 0.50  | 2.31           | 2.34  | 2.32  |
| 38  | 18.50   | Epimedin C            | 0.31           | 3.12  | 0.38  | 1.59           | 0.58  | 0.86  | 0.86           | 0.56  | 0.52  | 3.51           | 3.52  | 3.54  |
| 39  | 18.89   | Epimedin A            | 0.32           | 0.85  | 0.40  | 1.55           | 0.37  | 0.78  | 1.32           | 0.43  | 0.58  | 2.43           | 2.42  | 2.40  |
| 40  | 19.52   | Icariin               | 0.37           | 0.56  | 0.35  | 1.15           | 0.67  | 1.01  | 1.36           | 0.50  | 0.49  | 2.84           | 2.82  | 2.82  |
| 41  | 20.24   | Trihydro-TetrFl       | 0.40           | 0.44  | 0.36  | 1.45           | 0.52  | 0.57  | 2.61           | 0.86  | 0.83  | 1.91           | 1.92  | 1.93  |
| 42  | 21.09   | Phytanic acid         | 0.31           | 0.46  | 0.33  | 1.25           | 0.77  | 0.87  | 1.74           | 0.39  | 0.90  | 2.27           | 2.28  | 2.27  |

o-PyCt.A= o-Pyrocatechuic acid, GlyMonoOl= Glyceryl Monooleate, Glycer-Lin= Glyceryl linolenate, Ger-Iso= Geranyl isovalerate, Hexad.A= Hexadecanoic acid, 9-OctaDA(Z)= 9-Octadecenoic acid (Z)-, 2-Hyd-Trimeth= 2-Hydroxy-3,4,5-trimethoxychalcone, 3-Hyd-trimeth= 3-Hydroxy-7,8,3-trimethoxyflavone, E.dienoic, ME= 11,14-Eicosadienoic acid, methyl ester, and Trihydro-TetrFl= 4,5,7- trihydroxy 3,3,6,8-tetramethoxyflavone.

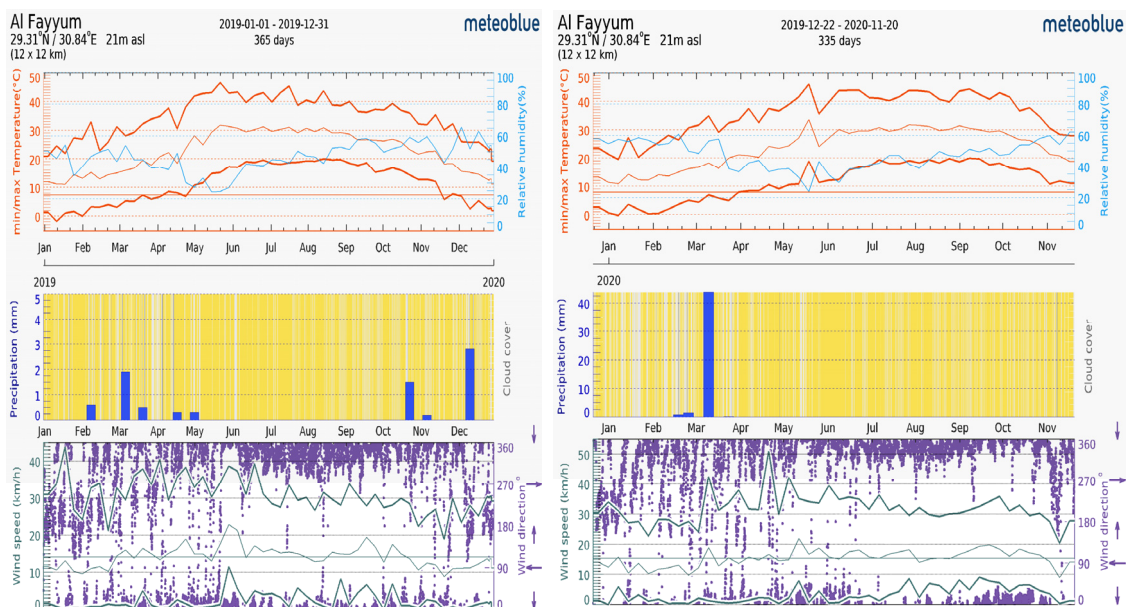

**Figure S1.** Monthly average of meteorological data of the experimental farm.

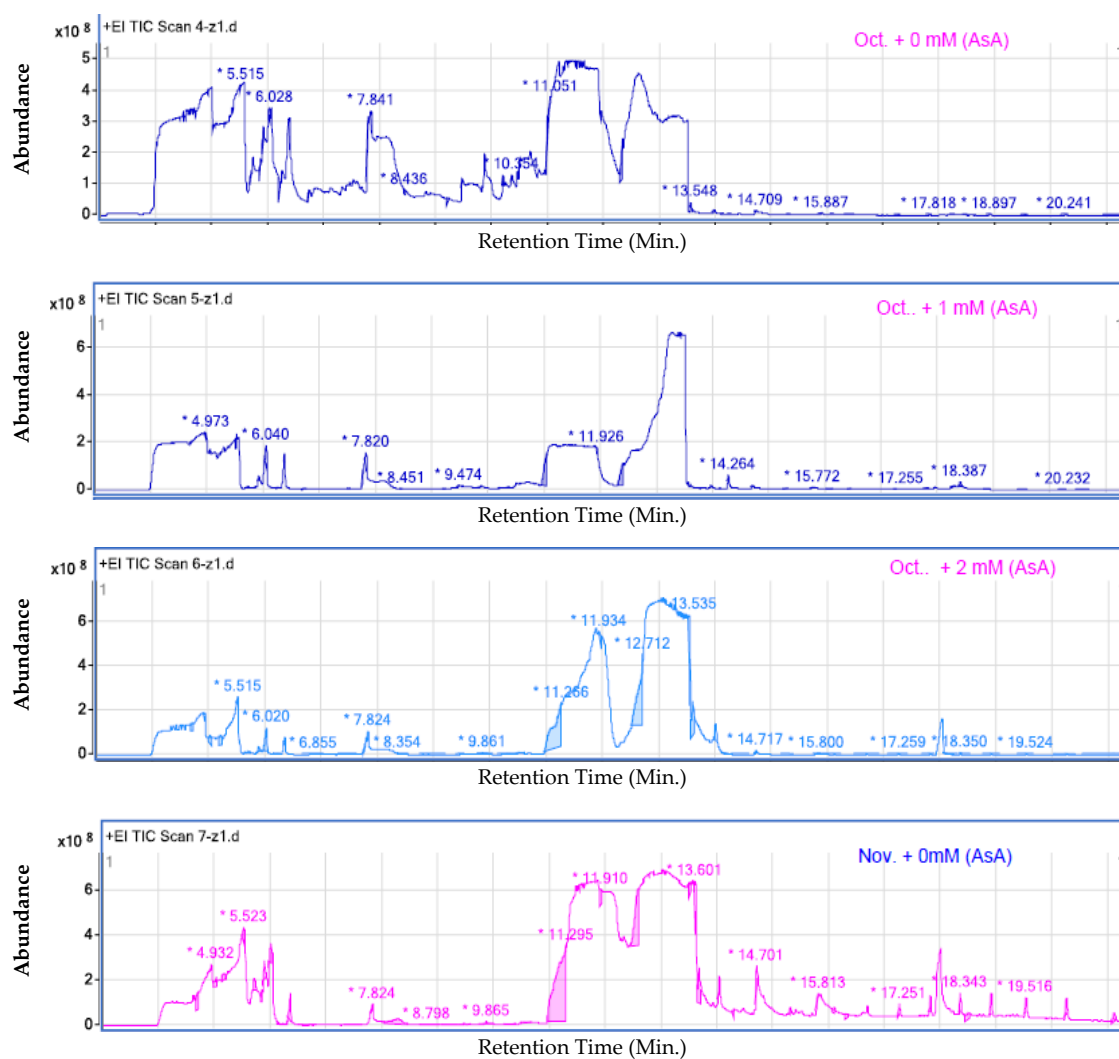

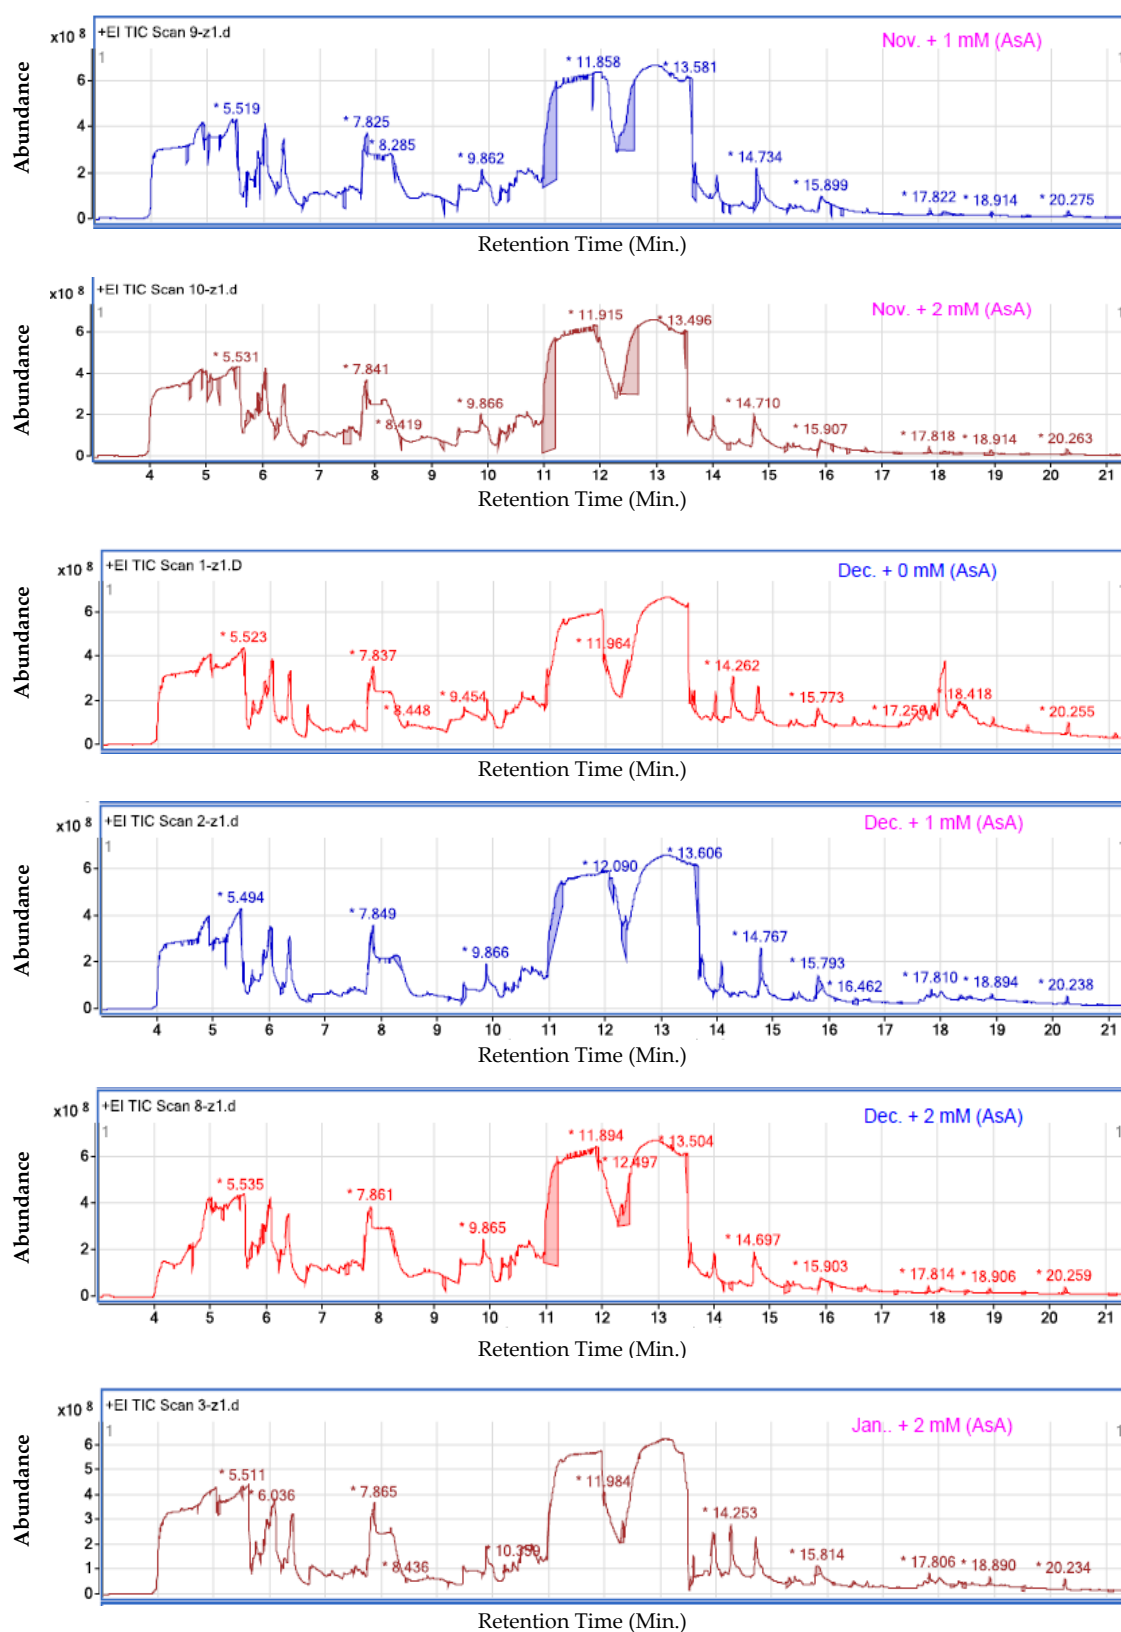

**Figure S2.** GC-MS chromatograms of parsley seed oil as affected by AsA treatments and low-temperature stress.
